# Supplementary material for: Engineering the outcome of cofermentation processes by altering the feedstock sugar-to-protein ratio
Source: Royal Society of Chemistry journal article supplement (doi:10.1039/d2ew00144f), 2022-01-01
Supplement: d2ew00144f1.pdf [file d2ew00144f1.pdf]

## Supplementary Material to: Engineering the outcome of cofermentation processes by altering the feedstock sugar-to-protein ratio

R. Bevilacqua\*, M. Mauricio-Iglesias, S. Balboa, J.M. Lema, M. Carballa

CRETUS, Department of Chemical Engineering, Universidade de Santiago de Compostela, 15782

Santiago de Compostela, Spain – [riccardo.bevilacqua@usc.es](mailto:riccardo.bevilacqua@usc.es)

### MATERIALS AND METHODS

#### Calculations

The acidification degree was calculated based on the concentration of measured VFA (in this case aliphatic VFA) and expressed as:

$$\text{Acidification degree (\%)} = \frac{\Sigma C_{VFA}}{C_{pr}} \times 100 \quad (1)$$

where  $C_{VFA}$  stands for the total concentration of the measured VFAs (in g COD-VFA/L) in the reactor effluent and  $C_{pr}$  for the total protein concentration (in g COD/L) in the feeding of the reactor.

Ammonification was also used as a proxy to monitor protein conversion to VFA, as amino acid fermentation is always related to  $\text{NH}_4^+$  release. It was expressed as follows:

$$\text{Ammonification (\%)} = \frac{C_{TANeffluent} - C_{TANfeeding} + C_{TANbiomass}}{C_{TANmaximum}} \times 100 \quad (2)$$

Where  $C_{TANeffluent}$  is the concentration of ammonium nitrogen (mg  $\text{N-NH}_4^+$ /L) measured in the reactor effluent,  $C_{TANfeeding}$  is the concentration of ammonium nitrogen (mg  $\text{N-NH}_4^+$ /L) in the reactor feeding derived from the macronutrients supplementation,  $C_{TANbiomass}$  is the concentration

of ammonium nitrogen ( $\text{mg N-NH}_4^+/\text{L}$ ) which was captured by biomass during growth and  $C_{\text{TANmaximum}}$  is the maximum concentration of ammonium nitrogen ( $\text{mg N-NH}_4^+/\text{L}$ ) achieved if complete conversion of the protein to VFA occurs.  $C_{\text{TANbiomass}}$  was calculated by multiplying the measured in-reactor biomass concentration for a biomass nitrogen ratio of  $114 \text{ mgN-NH}_4^+/\text{g VSS}$ , assuming an average biomass composition of  $\text{CH}_{1.8}\text{O}_{0.5}\text{N}_{0.2}$ .  $C_{\text{TANmaximum}}$  was estimated based on Total Kjeldahl Nitrogen measurements (SM4500C) of casein, which yielded a  $\text{mg N-NH}_4^+/\text{g protein}$  ratio of 171.94.

## RESULTS AND DISCUSSION

### 3.4 The influence of STP on the microbial community structure

Table S1. Data summary and Alpha diversity indexes. Total reads indicate the number of reads after low-quality data trimming and chimera removal. OTUs correspond to the number of OTUs above 1% of total abundance.

| Day | STP ratio | Total reads | OTUs | Diversity indexes |         |
|-----|-----------|-------------|------|-------------------|---------|
|     |           |             |      | Shannon           | Simpson |
| 63  | 0.25      | 33,874      | 98   | 4.19              | 0.90    |
| 70  | 0.25      | 34,343      | 95   | 3.84              | 0.88    |
| 77  | 0.25      | 32,006      | 94   | 3.99              | 0.89    |
| 218 | 0.50      | 34,544      | 92   | 3.68              | 0.86    |
| 225 | 0.50      | 36,889      | 66   | 2.68              | 0.69    |
| 232 | 0.50      | 28,266      | 94   | 3.87              | 0.88    |
| 246 | 0.75      | 41,517      | 94   | 3.45              | 0.78    |
| 253 | 0.75      | 42,916      | 90   | 3.51              | 0.80    |
| 260 | 0.75      | 34,131      | 92   | 3.85              | 0.87    |
| 330 | 1.0       | 36,292      | 83   | 2.11              | 0.64    |
| 337 | 1.0       | 39,111      | 79   | 1.91              | 0.54    |
| 344 | 1.0       | 46,105      | 89   | 2.52              | 0.68    |
| 81  | 2.0       | 33,455      | 76   | 3.05              | 0.78    |
| 84  | 2.0       | 42,174      | 69   | 2.68              | 0.74    |
| 88  | 2.0       | 32,062      | 67   | 2.52              | 0.70    |

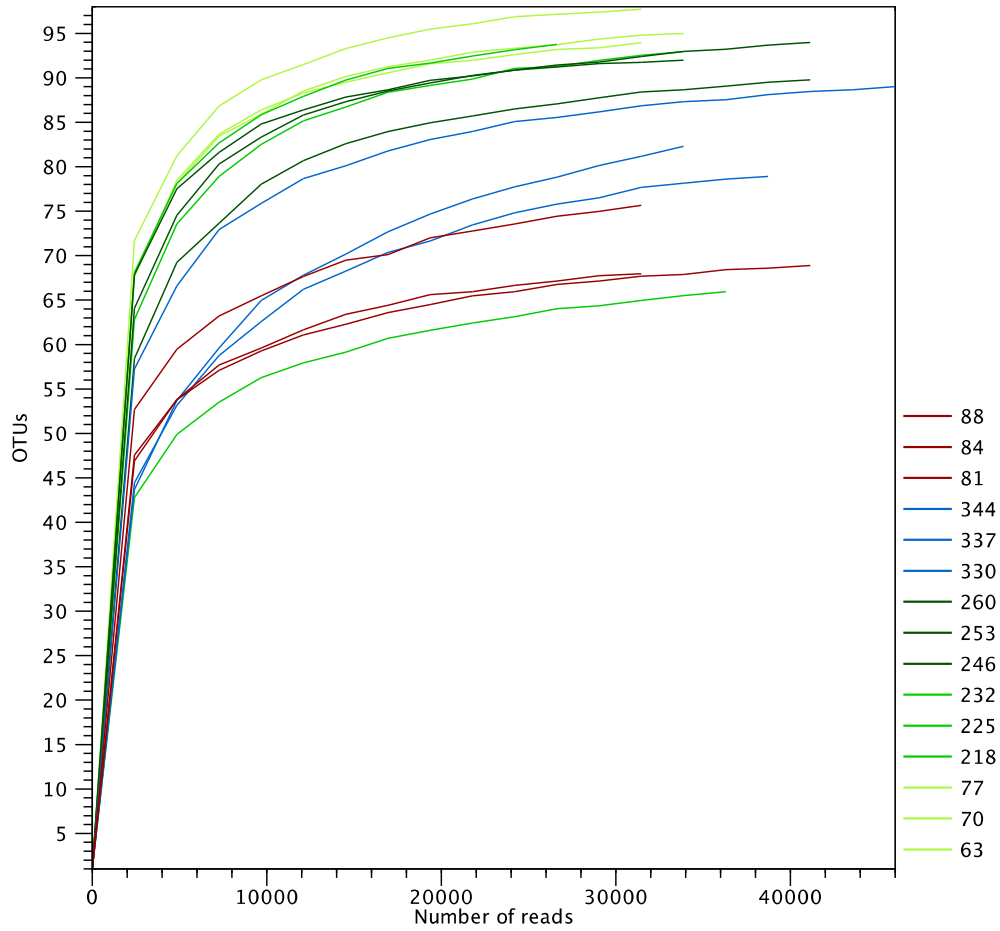

**Figure S1.** Rarefaction curves of OTUs. The x-axis represents the number of reads per sample and the y-axis the number of observed OTUs. Curves represent each sample and are coloured according to the STP ratio: 0.25 (light green), 0.5 (medium green), 0.75 (dark green), 1.0 (blue) and 2.0 (red).

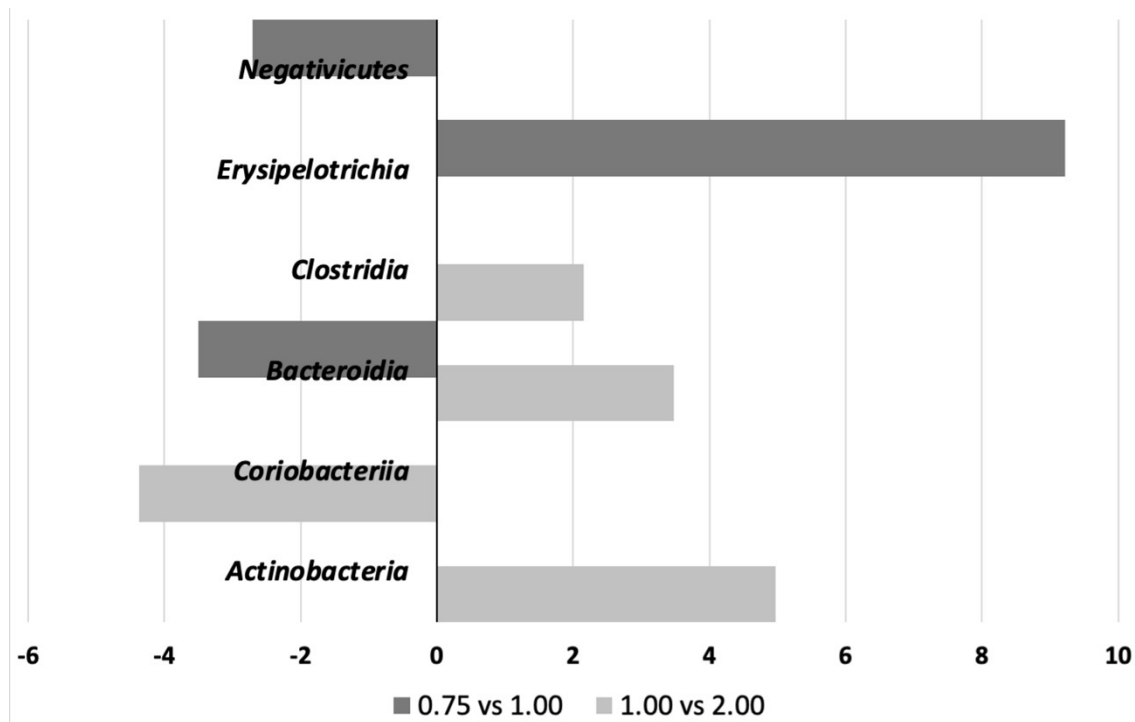

**Figure S2.** Significant differential abundance (log<sub>2</sub> fold change) of the most abundant bacterial classes between STP ratios of 0.75 and 1.0 (dark grey) and between the STP ratios of 1.0 and 2.0 (light grey).

## References

1. APHA. Standard Methods for the Examination of Water and Wastewater. *America Public Health Association*, 2017, Washington, DC, USA.
2. S.A. Cohen, K. De Antonis, D.P. Michaud. Compositional protein analysis using 6-aminoquinolyl-N-hydroxysuccinimidyl carbamate, a novel derivatization reagent. *Techniques in Protein Chemistry IV*, 289 – 298 (R.H. Angeletti, Ed.) Academic Press ,1993, San Diego, CA, USA.
